# Supplementary material for: Protein conjugated carboxylated gold@reduced graphene oxide for aflatoxin B1 detection
Source: Royal Society of Chemistry journal article supplement (doi:10.1039/c4ra12713g), 2014-12-01
Supplement: c4ra12713g1.pdf [file c4ra12713g1.pdf]

## Electronic Supplementary Information

### Protein conjugated carboxylated gold@reduced graphene oxide for aflatoxin B<sub>1</sub> detection

Saurabh Srivastava, Shiju Abraham, Chandan Singh, Md. Azahar Ali, Anchal Srivastava, Gajjala Sumana, B. D. Malhotra\*

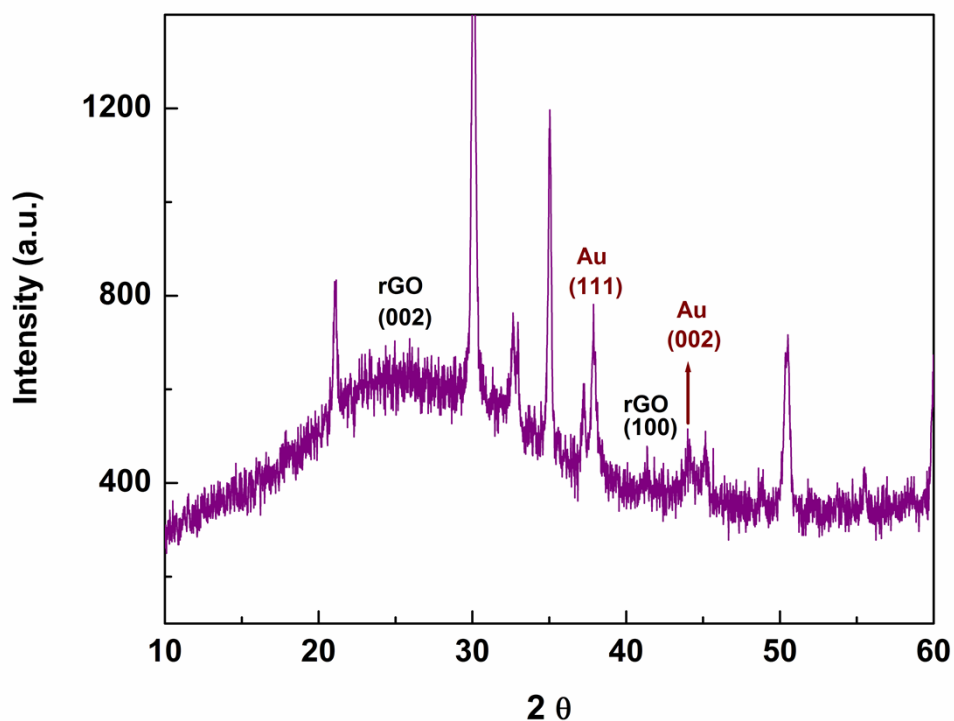

Fig. S1. X-ray diffraction pattern of electrophoretically deposited RGO-Au film over ITO substrate

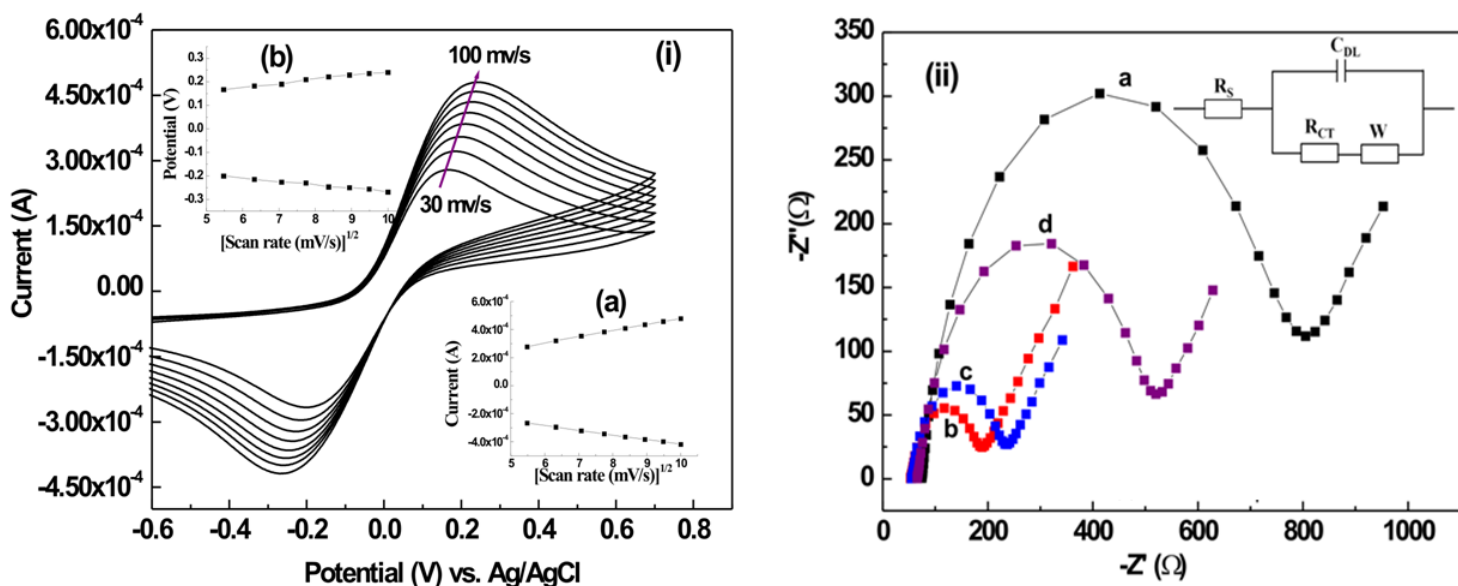

Fig. S2 (i) CV of the BSA/anti-AFB<sub>1</sub>/Au@rGO/ITO immunoelectrode obtained at different scan rates (30–100 mV/ s); inset (a): redox peak current as a function of the square root of the scan rate and inset (b): redox peak potential as a function of the square root of the scan rate and (ii) Electrochemical impedance spectra (EIS, Nyquist plot) obtained for (a) rGO/ITO, (b) Au@rGO/ITO, (c) anti-AFB<sub>1</sub>/ Au@rGO /ITO and (d) BSA/anti-AFB<sub>1</sub>/Au@rGO/ITO electrodes.
